# Supplementary material
Source: PubMed Central journal article supplement (PMC9069772)
Supplement: NIHMS1785705-supplement-1.pdf [file NIHMS1785705-supplement-1.pdf]

# Supplementary Figure 1

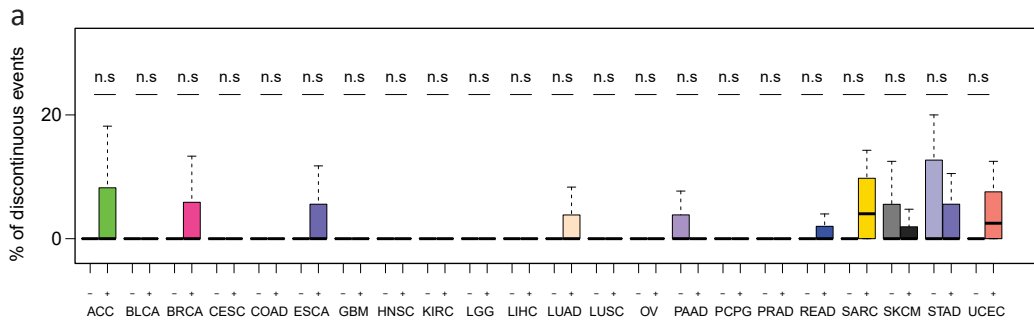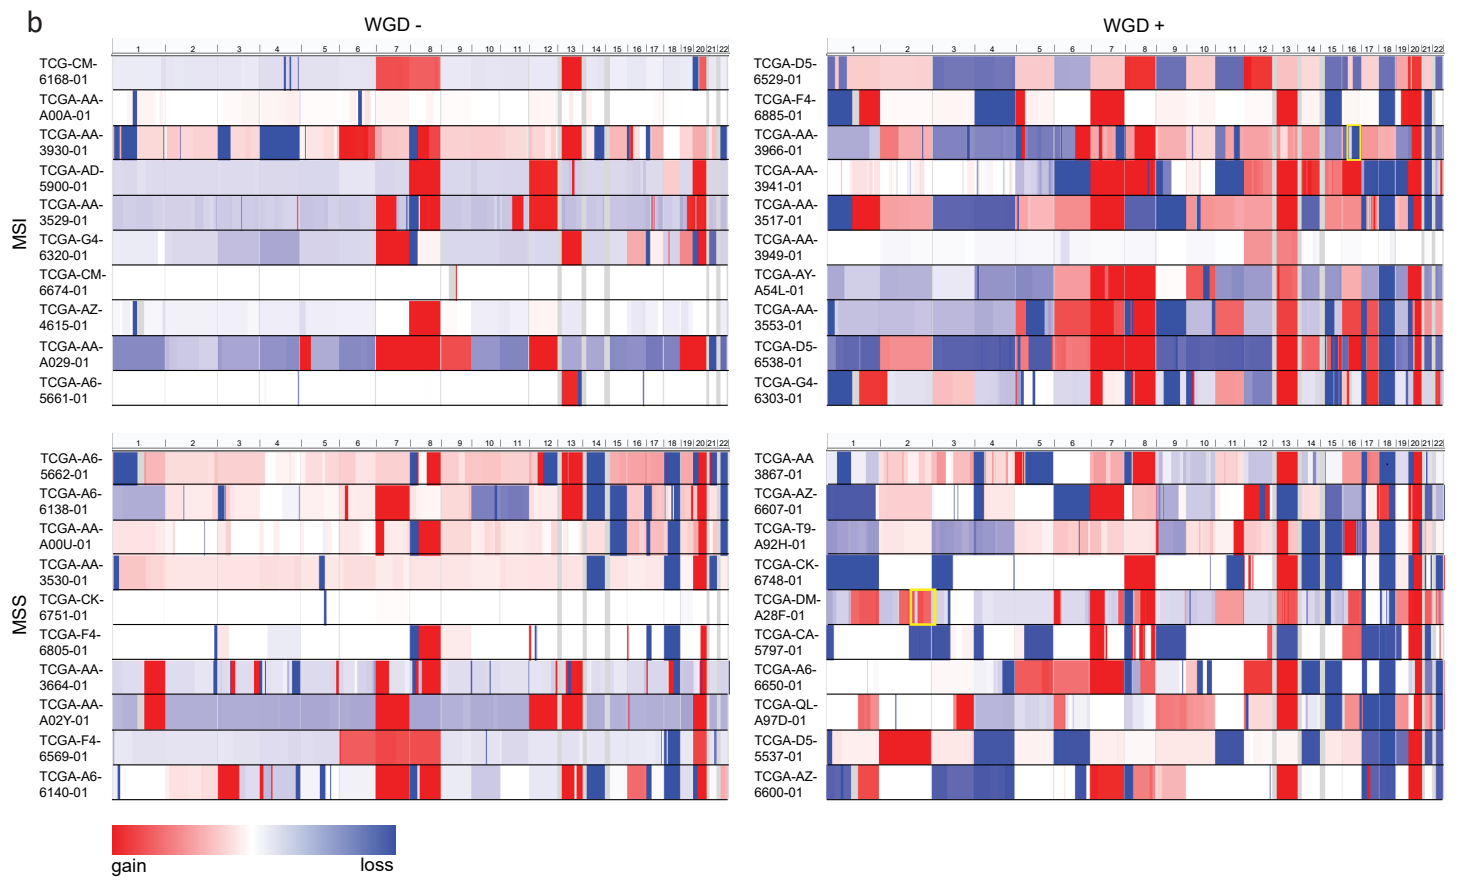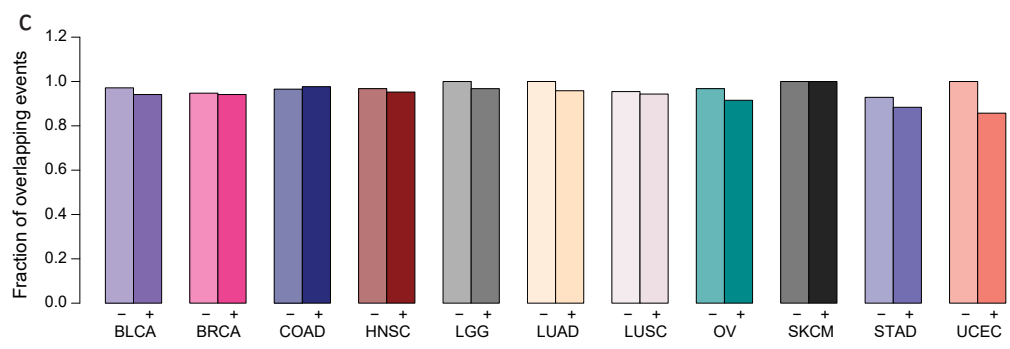

**Supplementary Figure 1: Robustness of arm-level aneuploidy calls (related to Figure 1).**

(a) Comparison of the fraction of chromosome-arm aneuploidies that are discontinuous (have >3 disruptions of the copy number state within the aberration), between WGD- and WGD+ tumors, across the 22 tumor types. 20 samples were randomly selected for each WGD group in each tumor type, and evaluated using IGV visualization. n.s.,  $p > 0.05$ . (b) IGV-based visualization of 20 MSI/WGD-, 20 MSI/WGD+, 20 MSS/WGD- and 20 MSS/WGD+ COAD samples. MSI, microsatellite instability; MSS, microsatellite stability. The only two discontinuous events that were considered to be chromosome-arm aneuploidies are encircled in yellow. (c) The concordance between two GISTIC runs, with the `-brlen` parameter set to 0.5 or to 0.9, across the 11 tumor types with the highest number of samples. Median overlap = 96.2%.

# Supplementary Figure 2

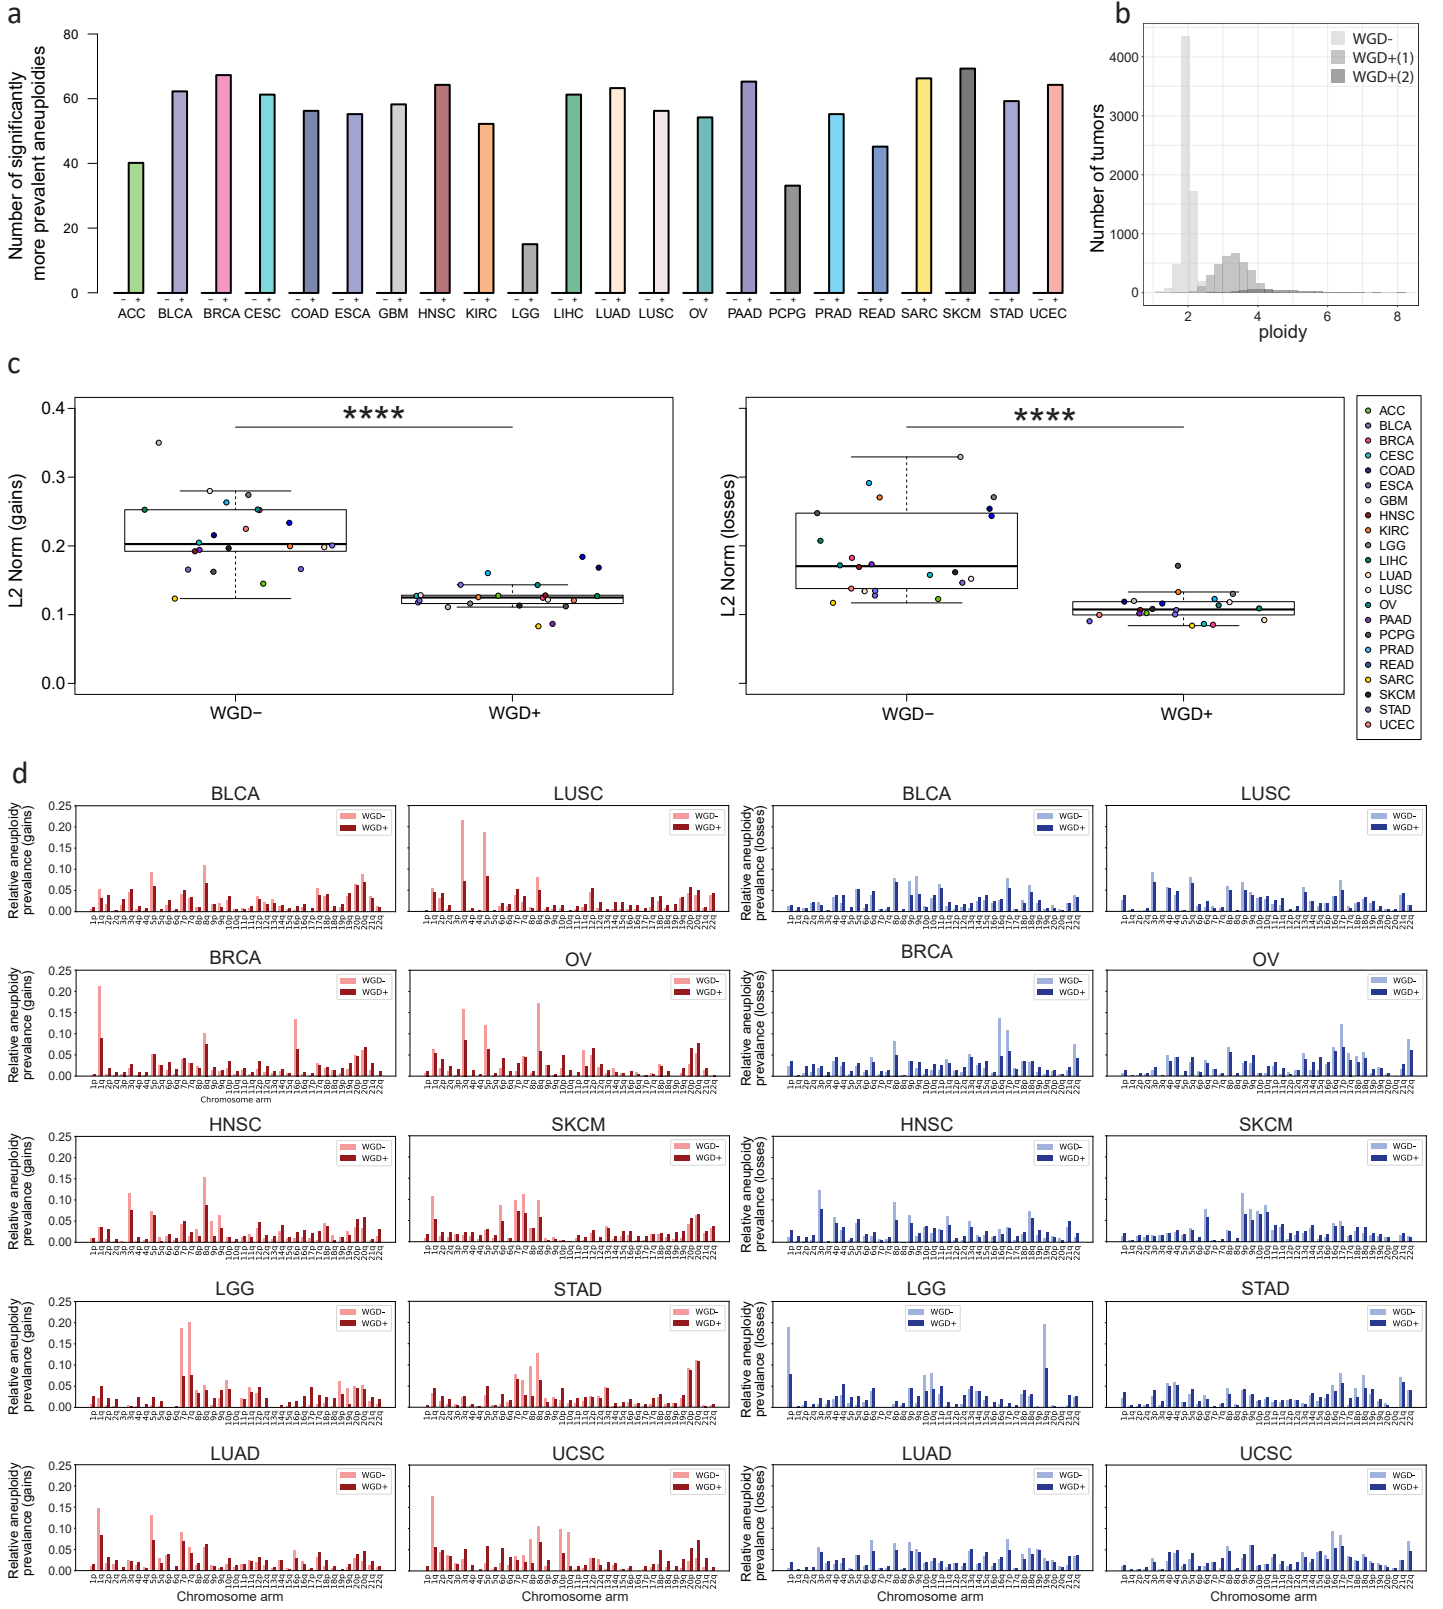

**Supplementary Figure 2: The prevalence and general features of aneuploidy in WGD- and WGD+ tumors (related to Figure 1).**

(a) Comparison of the number of aneuploidies that are significantly ( $p < 0.05$ ,  $q < 0.25$ , prevalence  $\geq 0.1$ ) more prevalent in one WGD group than in the other group. (b) Histogram presenting the ploidy distribution of tumors that have not undergone WGD (WGD-), those that have undergone WGD once (WGD+ (1)) and those that have undergone WGD twice (WGD+ (2)). (c) Comparison of the deviation of chromosome-arm gains (left) and losses (right) from a uniform distribution, between WGD- and WGD+ tumors, across the 22 tumor types. \*\*\*\*,  $p = 5e-08$  and  $p = 2e-07$ , for gains and losses, respectively; two-tailed paired Student's paired t-test. (d) The relative prevalence of chromosome-arm gains (left two columns) and losses (right two columns) in WGD- and WGD+ tumors of 10 selected tumor types. Tumor type abbreviations as in **Fig. 1**.

# Supplementary Figure 3

a

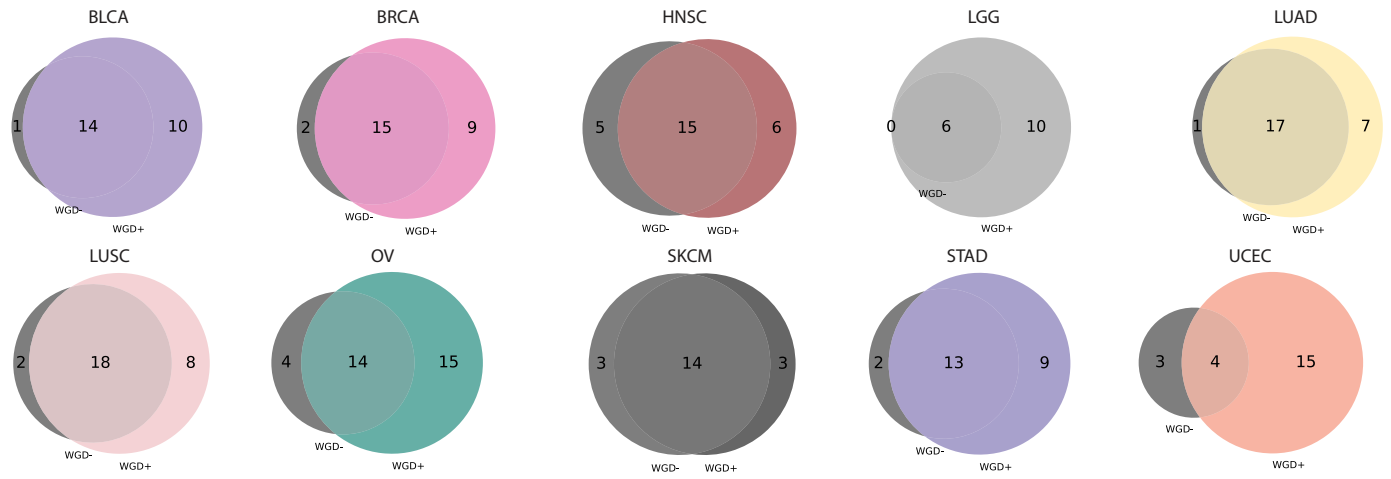

b

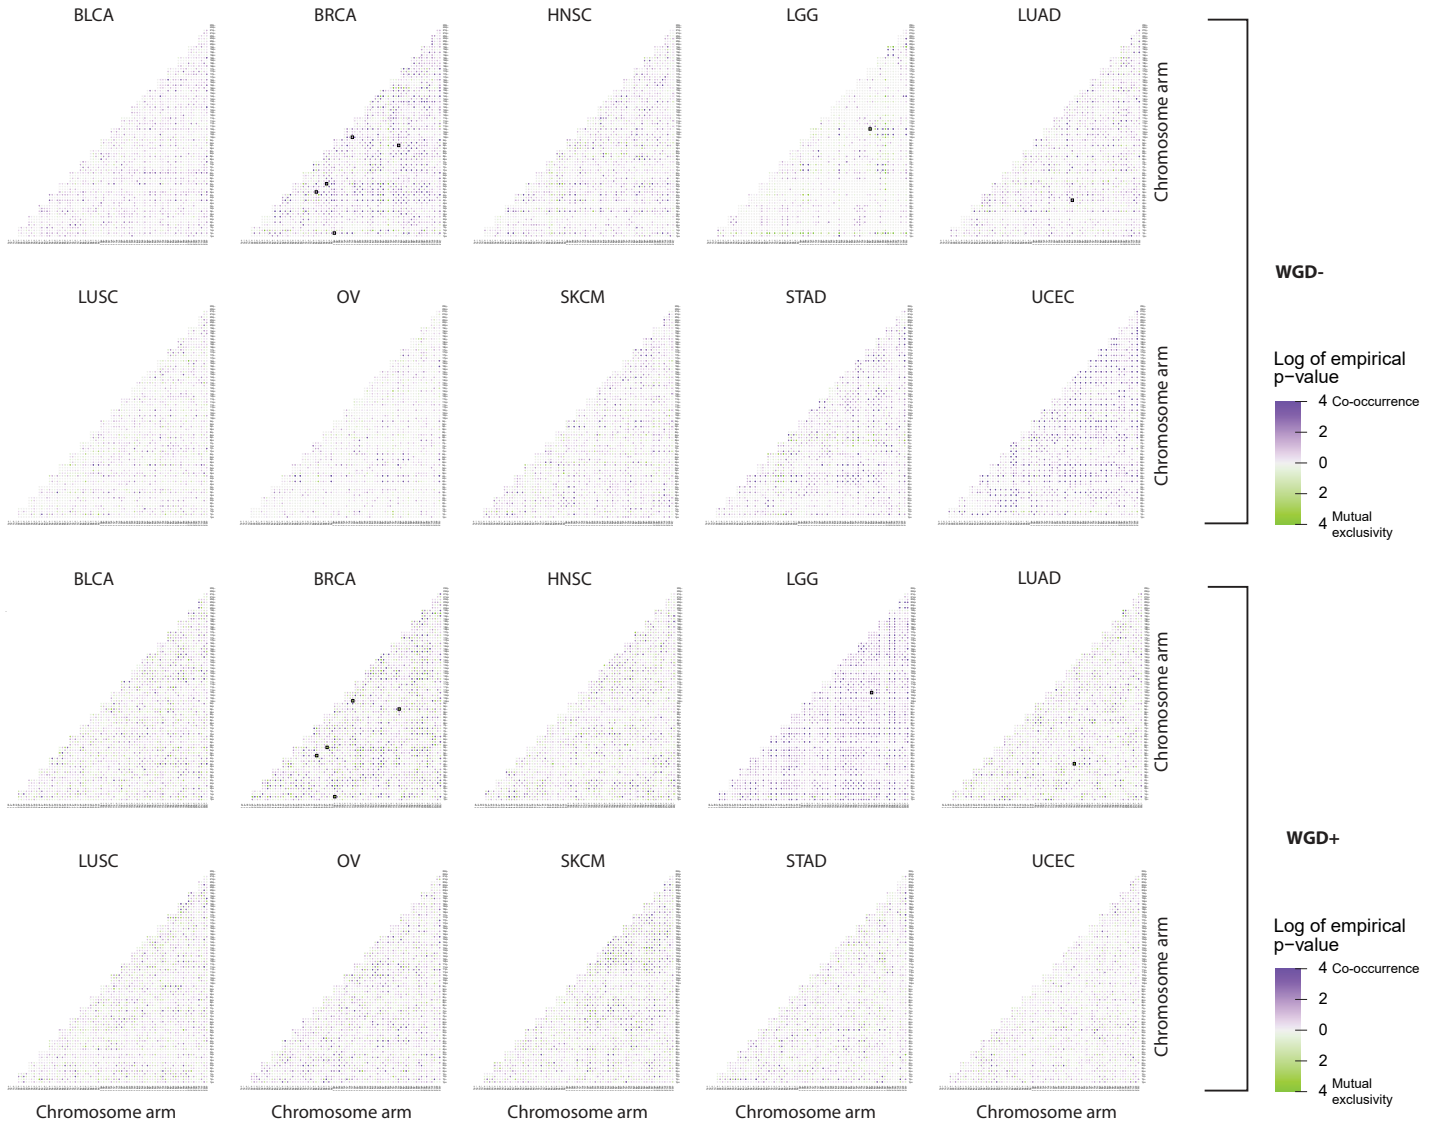

c

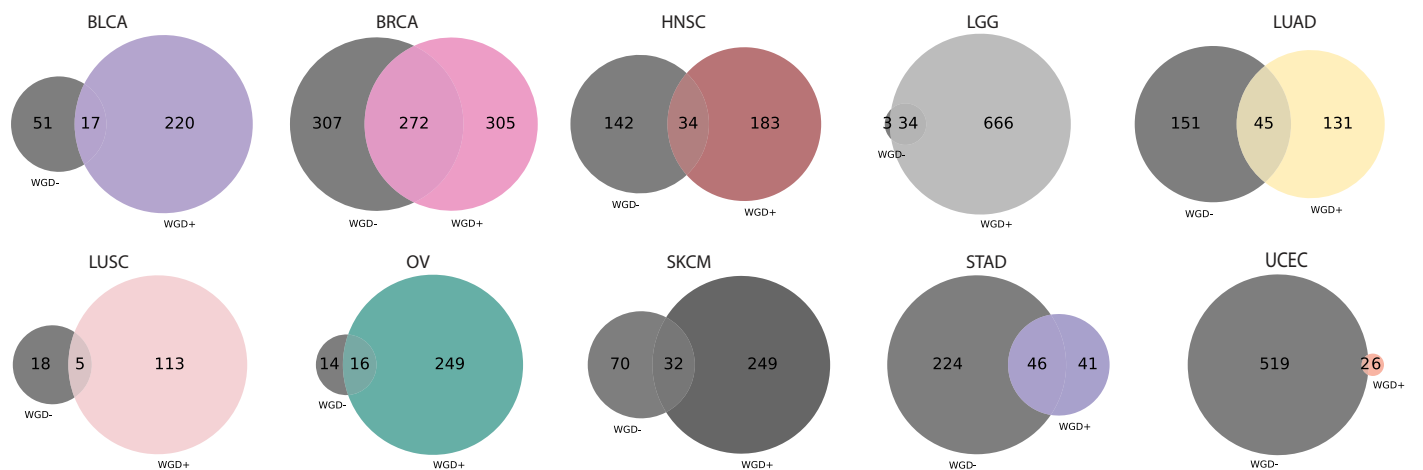

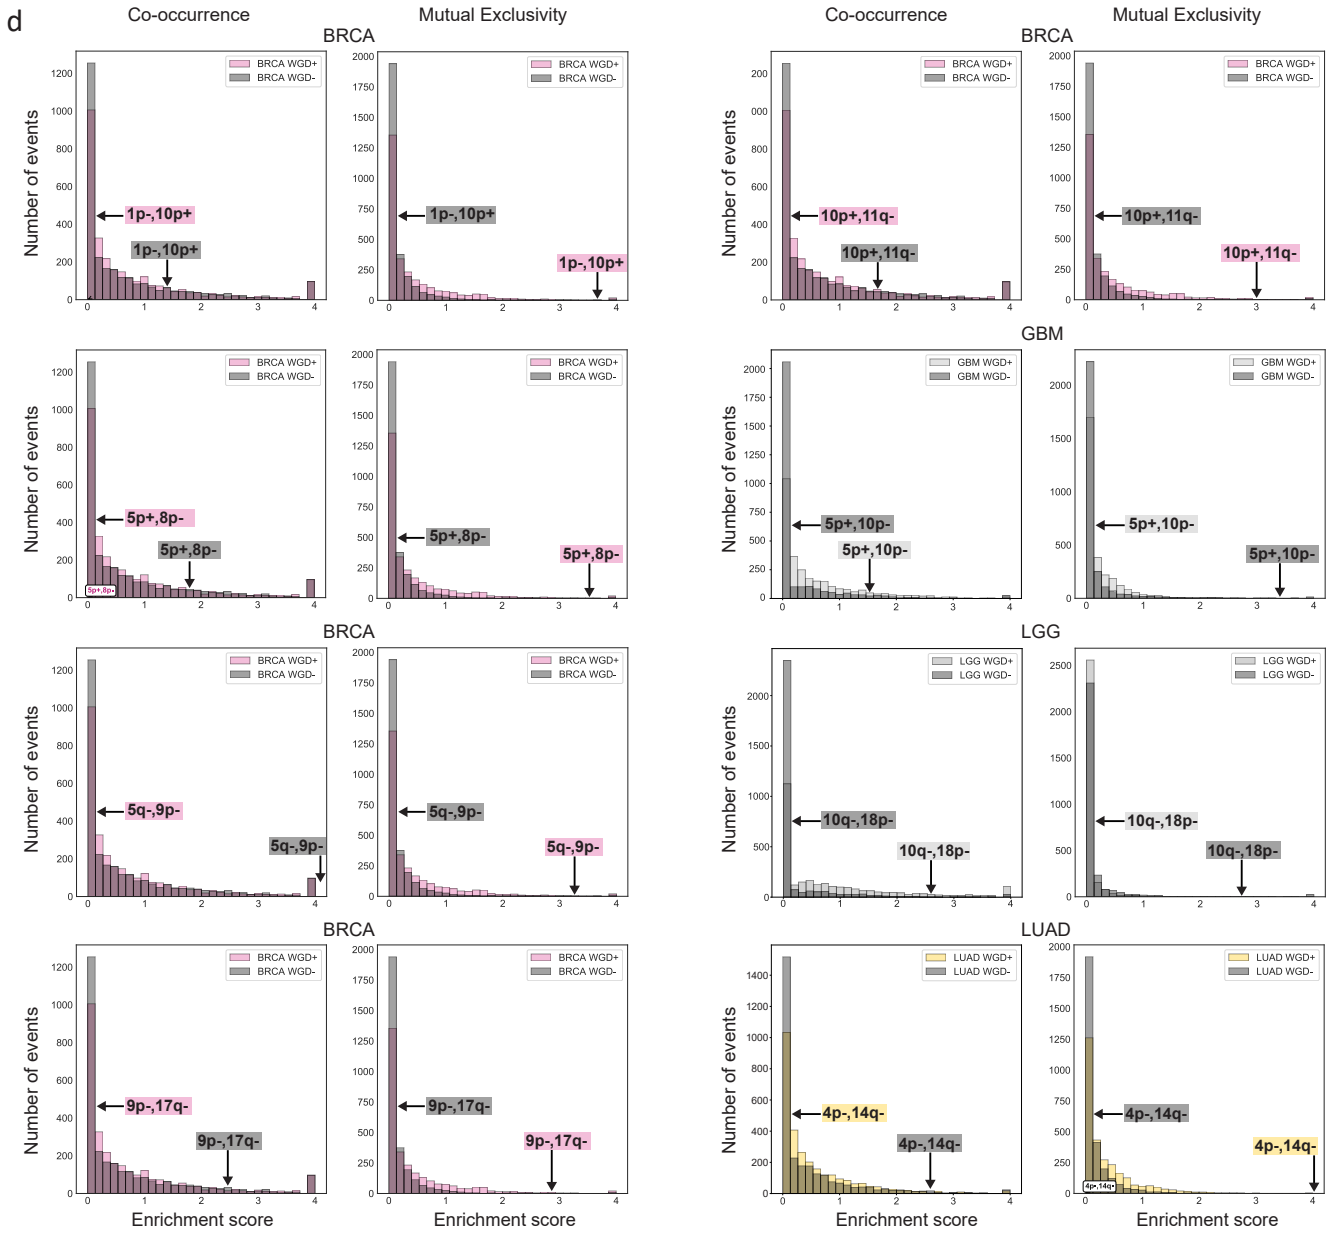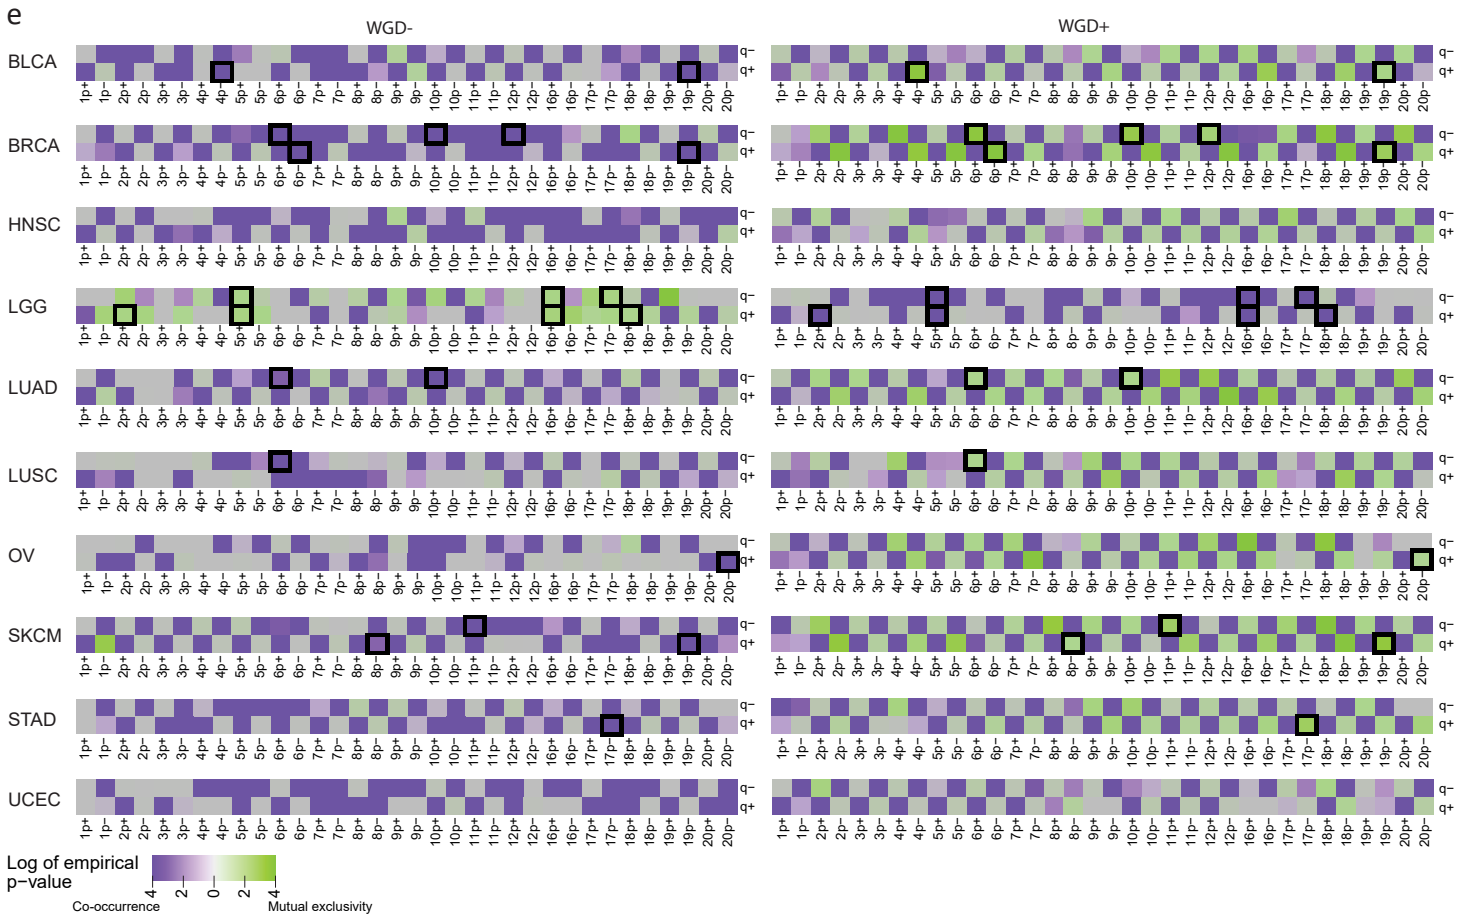

**Supplementary Figure 3: WGD is associated with significant changes in pair-wise chromosome-arm genetic interactions (related to Figure 2).**

(a) Venn diagrams of the number of significant (GISTIC 2.0  $q < 0.05$ ) chromosome-arm aneuploidies in WGD- and WGD+ tumors of 10 selected tumor types. (b) Heatmaps of the significance ( $-\log(\text{empirical p-value})$ ) of positive genetic interactions (co-occurrence, purple) and negative genetic interactions (mutual exclusivity, green) between chromosome arms of different chromosomes in WGD- tumors (top two rows) and WGD+ tumors (bottom two rows) of 10 selected tumor types. Events that were significantly co-occurring in one WGD group but significantly mutually exclusive in the other WGD group of the same tumor type (empirical  $p < 0.05$ ,  $q < 0.25$ ) are highlighted on the heatmaps. (c) Venn diagrams of the number of the significantly co-occurring (empirical  $p < 0.05$ ,  $q < 0.25$ ) chromosome-arm inter-chromosomal genetic interactions in WGD- and WGD+ tumors of 10 selected tumor types. (d) Histograms of the distribution of enrichment scores (defined as  $-\log(\text{empirical p-value})$ ) for co-occurrence (left) and mutual exclusivity (right) of inter-chromosomal genetic interactions in WGD- vs. WGD+ tumors of BRCA, GBM, LGG and LUAD tumors. Discordant genetic interactions, which are co-occurring in one of the WGD groups but mutually exclusive in the other, are highlighted on the histograms. (e) Heatmaps of the significance ( $-\log(\text{empirical p-value})$ ) of positive genetic interactions (co-occurrence, purple) and negative genetic interactions (mutual exclusivity, green) between gains and losses of chromosome arms within the same chromosome in WGD- tumors (left) and WGD+ tumors (right) of 10 selected tumor types. Events that were significantly co-occurring in one WGD group but significantly mutually exclusive in the other WGD group of the same tumor type (empirical  $p < 0.05$ ,  $q < 0.25$ ) are highlighted on the heatmaps. Tumor type abbreviations as in **Fig. 1**.

# Supplementary Figure 4

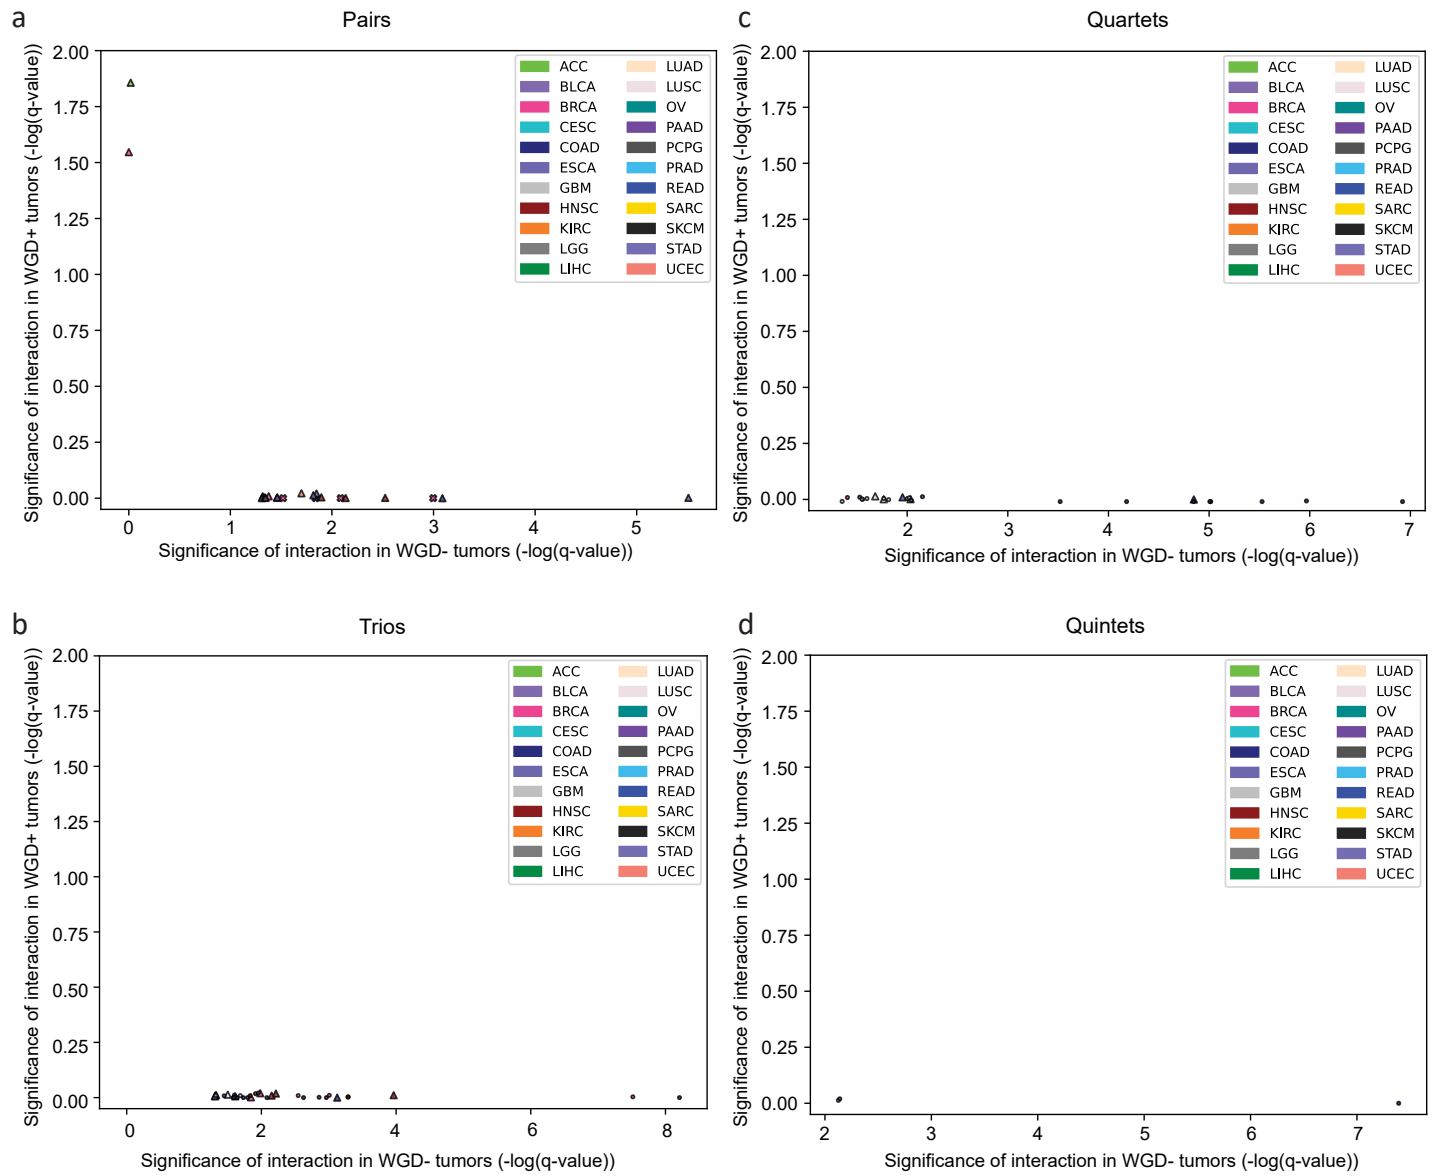



**Supplementary Figure 4: WGD is associated with significant changes in multiple chromosome-arm genetic interactions (related to Figure 2).**

(a) Scatter plots of the significance ( $-\log(q\text{-value})$ ) of positive genetic interactions (co-occurrence) between pairs ( $n=2$ ) of chromosome arms from different chromosomes in WGD- tumors (x-axis) and WGD+ tumors (y-axis) across tumor types. Interactions that were significantly co-occurring in one WGD group but significantly mutually exclusive in the other WGD group of the same tumor type ( $q < 0.05$  for one WGD group and  $q > 0.95$  for the other WGD group) are shown. Interactions are color coded by tumor type (tumor type abbreviations as in **Fig. 1**). Interactions also identified by the permutation analysis are shaped as 'x'.

(b) Scatter plots of the significance ( $-\log(q\text{-value})$ ) of positive genetic interactions (co-occurrence) between trios ( $n=3$ ) of chromosome arms from different chromosomes in WGD- tumors (x-axis) and WGD+ tumors (y-axis) across tumor types. Interactions that were significantly co-occurring in one WGD group but significantly mutually exclusive in the other WGD group of the same tumor type ( $q < 0.05$  for one WGD group and  $q > 0.95$  for the other WGD group) are shown. Interactions are color coded by tumor type (tumor type abbreviations as in **Fig. 1**). Interactions found to be more significant than any of the subset interactions within them are shaped as triangles. (c) as in (b), but with quartets ( $n=4$ ) of chromosome arms. (d) as in (b) but with quintets ( $n=5$ ) of chromosome arms.

Supplementary Figure 5

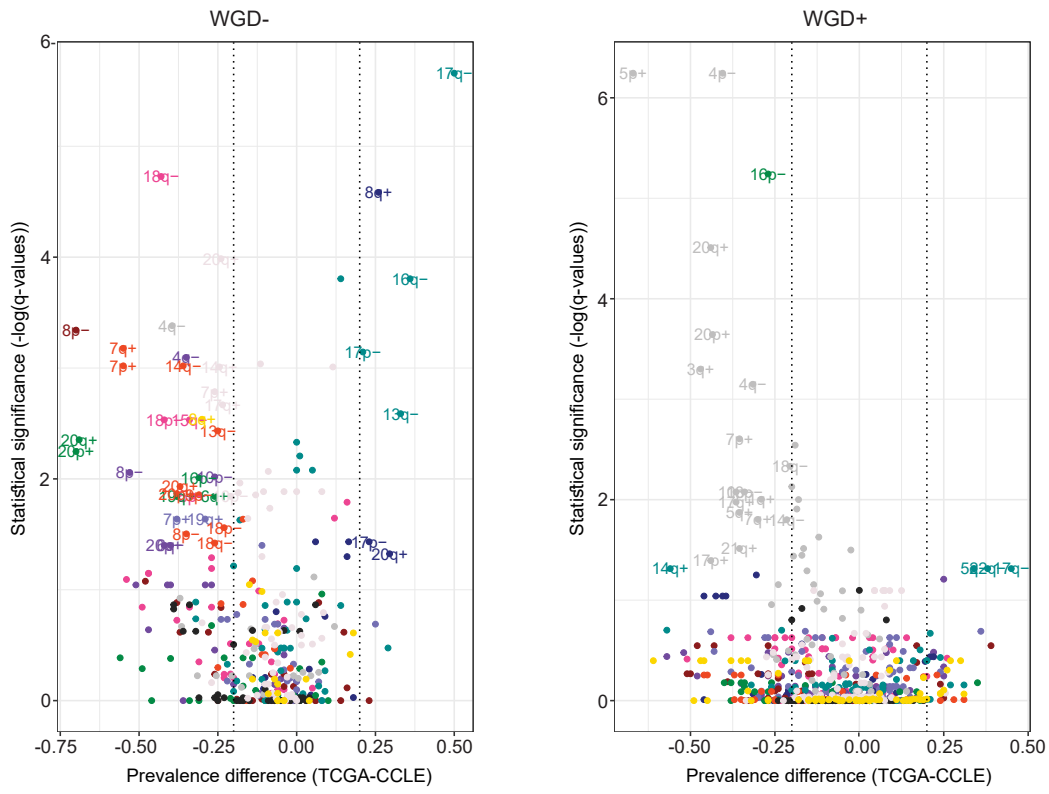

**Supplementary Figure 5: Comparison of the aneuploidy landscapes between tumors (TCGA) and cell lines (CCLE) (related to Figure 3).**

Volcano plots showing the differential aneuploidy landscapes between tumors and cell lines, for WGD- (left) and WGD+ (right) samples. Events were determined to differentially recur in tumors and in cell lines if the difference in their prevalence was  $> 0.2$  and  $q\text{-value} < 0.05$  (two-tailed Fisher's Exact test). Only ~11% and ~3% of the recurrent events were discordant between cell lines and tumors, in WGD- and WGD+ samples, respectively. Note that brain cancer cell lines were an exception to this overall high similarity, as several aneuploidies recur in WGD+ CNS cell lines but not in primary brain tumors.

# Supplementary Figure 6

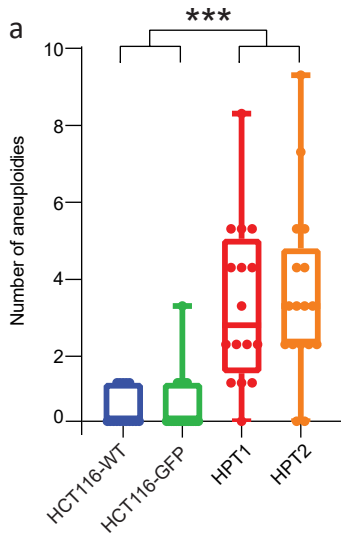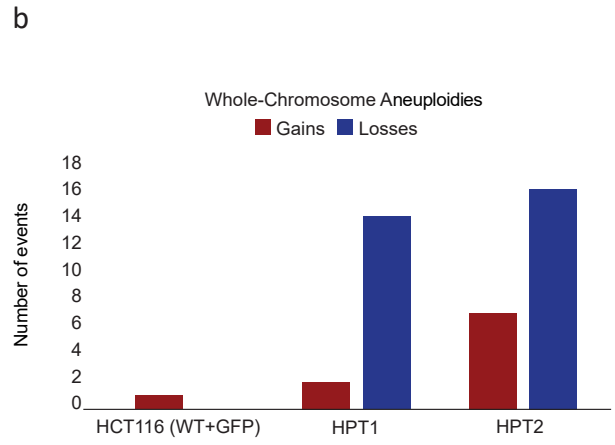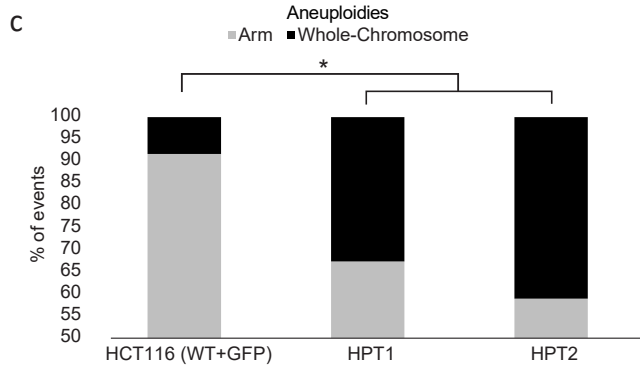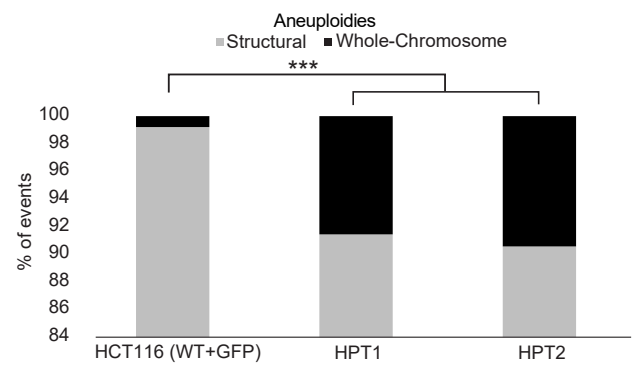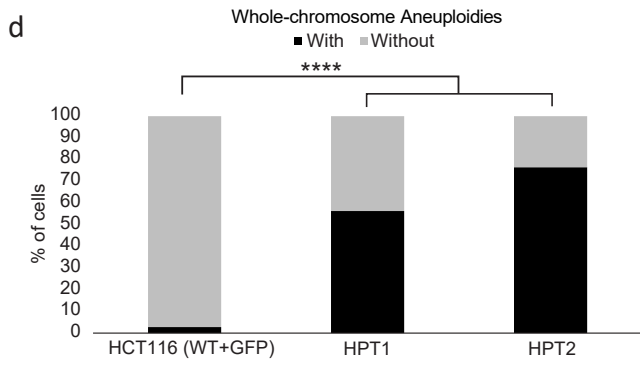

**Supplementary Figure 6: Isogenic WGD- and WGD+ HCT116 cell lines demonstrate a causal effect of WGD on aneuploidy landscapes (related to Figure 4).**

(a) scDNAseq-based comparison of the number of aneuploidies (relative to basal ploidy) between the near-diploid parental HCT116 cells (HCT116-WT), HCT116 cells expressing GFP (HCT116-GFP), and two WGD+ HCT116 clones (HPT1 and HPT2). \*\*\*,  $p < 0.001$ ; two-tailed Student's t-test. (b) The number of whole-chromosome gains and losses observed by mFISH, in HCT116 and its derived WGD+ clones (>20 single cells per clone). (c) The relative fraction of whole-chromosome aneuploidies relative to arm-level aneuploidies (left) or structural aneuploidies (right; including arm-level aneuploidies, translocations and smaller structural alterations), in HCT116 and its derived clones. \*,  $p < 0.05$ , \*\*\*,  $p < 0.001$ ; one-tailed Fisher's Exact test. (d) The fraction of cells with non-clonal whole-chromosome aneuploidies, a measure of karyotypic heterogeneity, in HCT116 and its derived clones. \*\*\*\*,  $p < 0.0001$ ; one-tailed Fisher's Exact test.

# Supplementary Figure 7

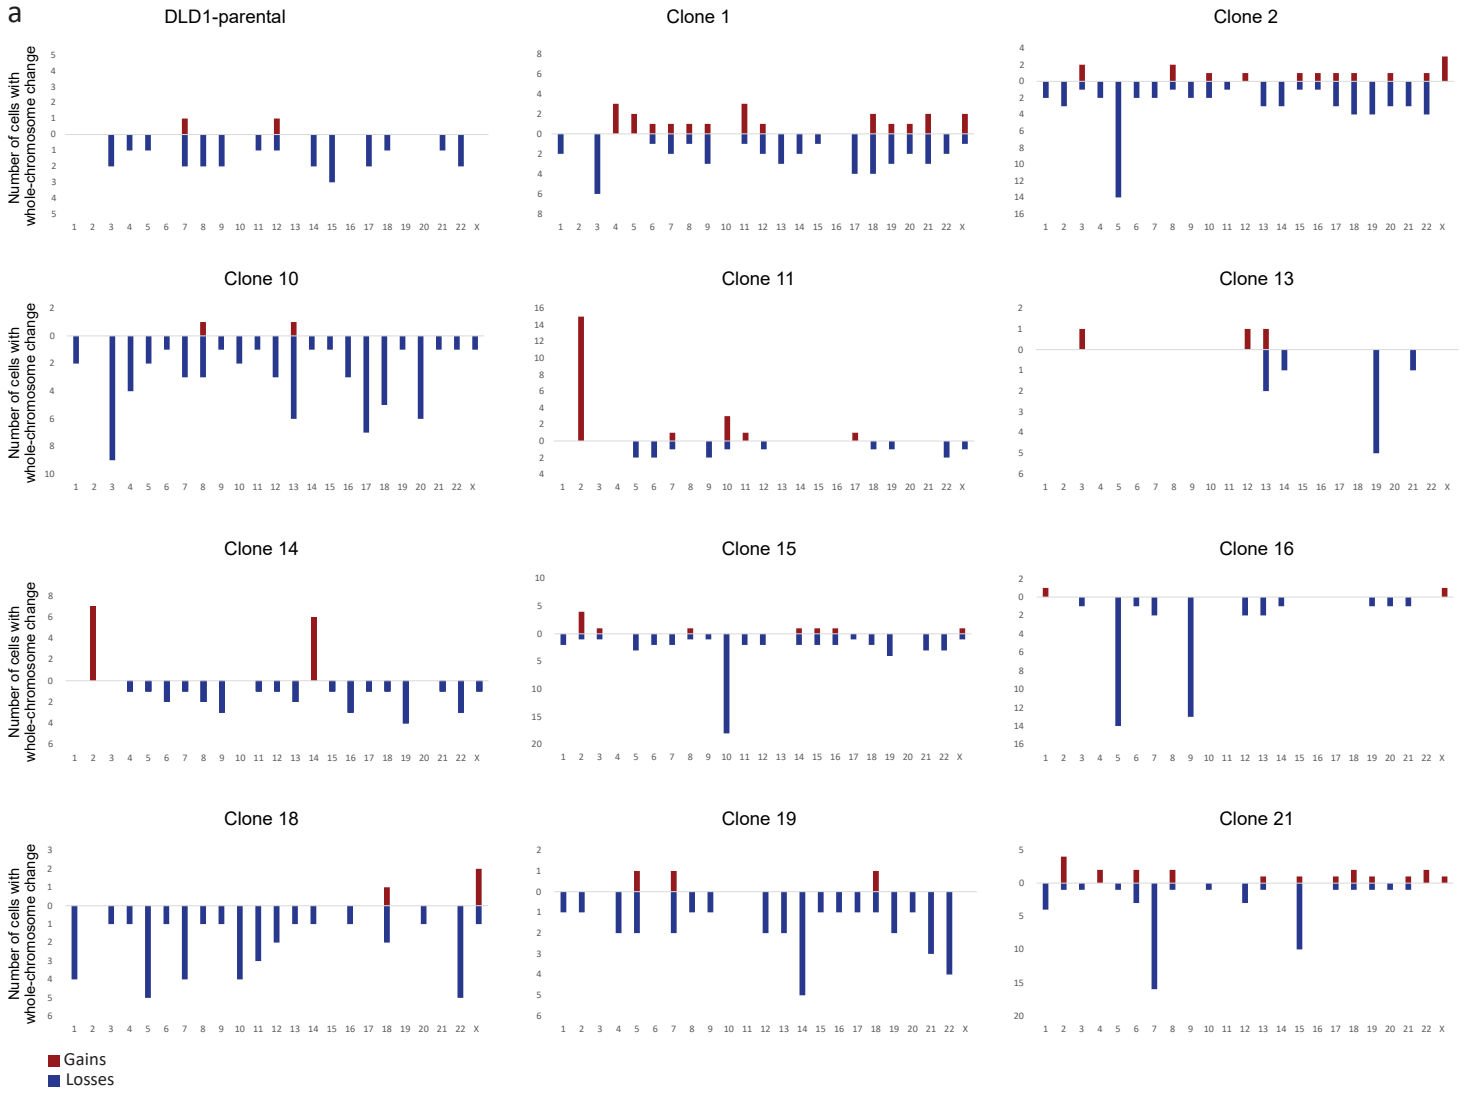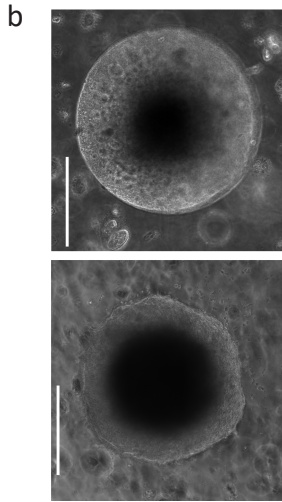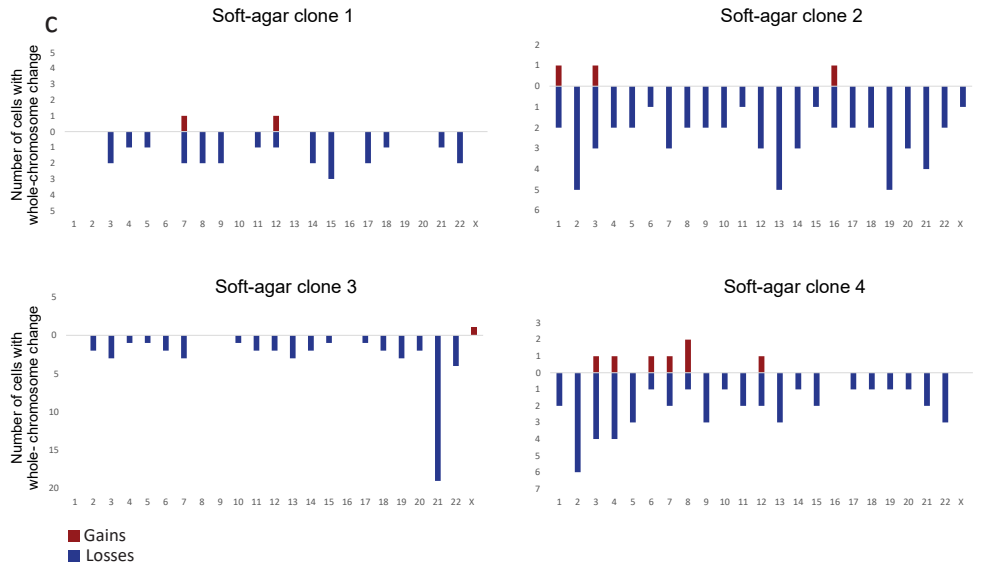

**Supplementary Figure 7: Selection pressures result in non-convergent karyotypic evolution (related to Figure 5).**

(a) Bar plots of the number of cells with gains and losses of each chromosome in the near-diploid parental DLD1 cells (DLD1-parental), and 11 DLD1-derived WGD+ clones. (b) Representative images of soft-agar macrocolonies emerging from DLD1 cells evolved for 12 days post-cytokinesis failure. Scale, 500  $\mu$ M. (c) Bar plots of the number of cells with gains and losses of each chromosome in the four profiled soft-agar colonies.

# Supplementary Figure 8

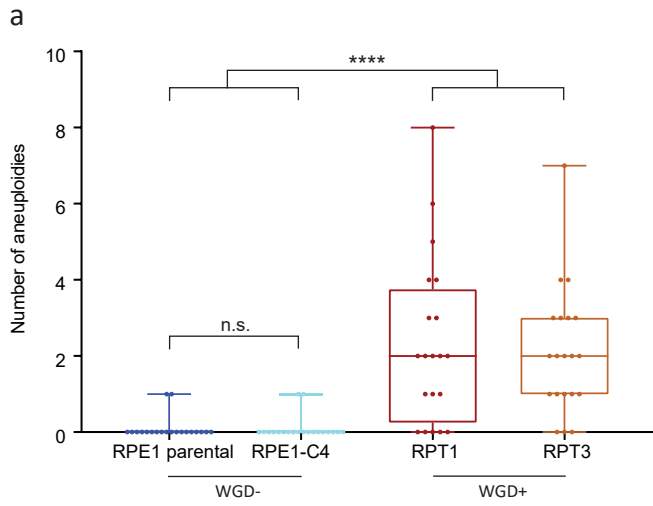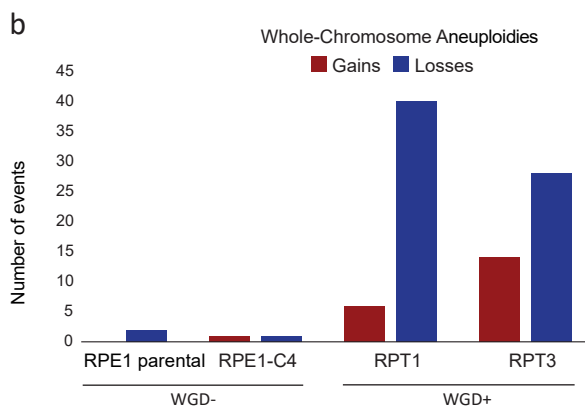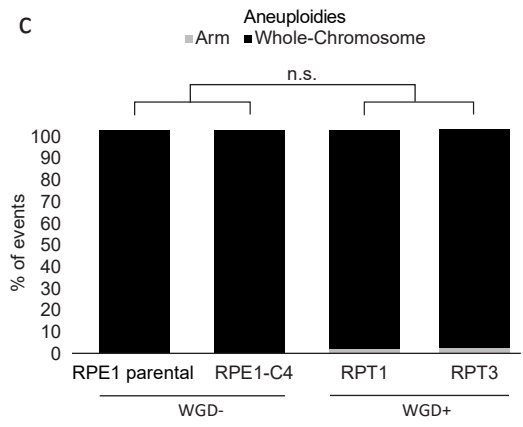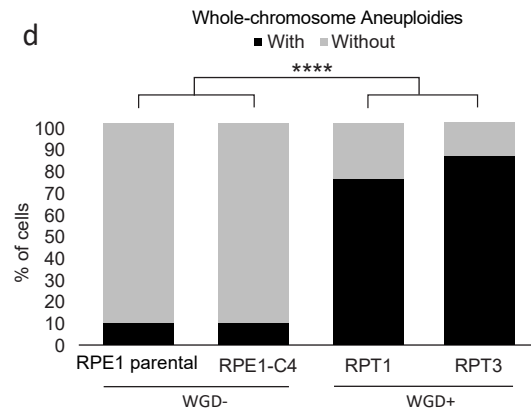



**Supplementary Figure 8: Isogenic WGD- and WGD+ RPE1 cell lines demonstrate a causal effect of WGD on aneuploidy landscapes.**

(a) mFISH-based comparison of the number of aneuploidies (relative to basal ploidy) between near-diploid parental RPE1 cells (RPE1-parental), an RPE1-derived WGD- clone (RPE1-C4), and two RPE1-derived WGD+ clones (RPT1 and RPT3). n.s.,  $p > 0.05$ , \*\*\*\*,  $p < 0.0001$ ; two-tailed Student's t-test. (b) The number of whole-chromosome gains and losses observed by mFISH, in RPE1 and its derived clones (>20 cells per clone). (c) The relative fraction of whole-chromosome aneuploidies relative to arm-level aneuploidies in RPE1 and its derived clones. n.s.,  $p > 0.05$ ; one-tailed Fisher's Exact test. Note that only two aneuploidies were identified in the WGD- RPE1 cells (both in RPE1-parental and in RPE1-C4 cells), rendering this comparison uninformative. (d) The fraction of cells with whole-chromosome aneuploidies, a measure of karyotypic heterogeneity, in RPE1 and its derived clones. \*\*\*\*,  $p < 0.0001$ ; one-tailed Fisher's Exact test.
